# Supplementary material for: Perinatal Exposure to Nicotine Alters Sperm RNA Profiles in Rats
Source: Front Endocrinol (Lausanne). 2022 May 4;13:893863. doi: 10.3389/fendo.2022.893863 (PMC9114732; doi:10.3389/fendo.2022.893863)
Supplement: Supplementary file 12 [file DataSheet_12.xlsx]

## Sheet: NIC_eGO
NIC_eGOBP
ID	Description	GeneRatio	GeneRatioa	GeneRatiob	BgRatio	BgRatioa	BgRatiob	pvalue	p.adjust	qvalue	geneID	Count	Flodenrichment
GO:0045666	positive regulation of neuron differentiation	433/11943	433	11943	483/18303	483	18303	5.00585e-36	3.27182e-32	1.40217e-32	Sh3gl3/Neurog2/Bcl6/Bdnf/Rhoa/Tcf3/Dlx2/Lrrc7/Fut9/Nefl/Ntrk3/Prkci/Hgf/Marcks/Ascl1/Tox/Adcyap1/Zfp804a/Snx3/Itgb1/Irx3/Fezf1/Bmpr2/Vegfa/Ache/Fbxo38/Wnt5a/Cntn1/Foxa1/Stk24/Impact/Cux2/Bmp2/Ndel1/Epha3/Nlgn1/Gsk3b/Lrp8/Elavl4/Fmr1/Cpeb3/Il1rapl1/Pten/Arf1/Nptn/Parp6/Cyfip1/Pafah1b1/Ptk6/Trpc5/Kalrn/Prox1/Actr3/Epha4/Spag9/Met/Foxg1/Bmp7/Zeb1/Lrp6/Fgfr1/Bnip2/Zc4h2/Crx/Shox2/Bcl2/Abl2/Brinp1/Gdf…	433	1.37388
GO:0003002	regionalization	344/11943	344	11943	379/18303	379	18303	1.90549e-31	6.22713e-28	2.66868e-28	Nkx6-2/Ripply2/Nr2f2/Msx2/Yy1/Spry1/Dlx2/Fgfr2/Ets2/Chsy1/Frs2/Hes1/Pitx2/Gas1/Pcdh8/Mnx1/Bhlhe40/Atm/Ascl1/Poglut1/Hoxa4/Prkacb/Bmpr1a/Aurka/Snai1/Mapk8/Ctnnb1/Irx3/Tbr1/Fezf1/Bmpr2/Kdm2b/Fgf1/Pcsk5/Dmrta2/Sfrp2/Wnt5a/Hoxa9/Foxa1/Myf6/Ptch1/Crkl/Bmp2/Dll1/Hoxa10/Sema3c/En1/Traf3ip1/Mib1/Gorab/Myf5/Smo/Lef1/Hoxa5/Smad4/Foxg1/Dync2h1/Lrp6/Med12/Mesp2/Fgfr1/Nrp2/Fzd5/Hoxc8/Kdm6a/Axin2/Kif3a/Six3/Tu…	344	1.391
GO:0007409	axonogenesis	426/11943	426	11943	485/18303	485	18303	1.3692e-30	2.63455e-27	1.12906e-27	Neurog2/Bdnf/Rab10/Ttc8/Fgfr2/Nr4a2/Gata3/Nefl/Ntrk3/Spast/Gas1/Mnx1/Itgb1/Tbr1/Fezf1/Bmpr2/Vegfa/Alcam/Ache/Dclk1/Stxbp1/Wnt5a/Lgr4/Rnf6/Slitrk6/Ptch1/Ptk2/Ndel1/Epha3/Ptpro/Clasp2/Gsk3b/Arx/Fbxo45/Auts2/Wdr36/Sema3c/Dag1/Efnb2/Pten/Atl1/Nptn/Cyfip1/Pafah1b1/Trpc5/Smo/Kalrn/Actr3/Usp9x/Epha4/Cntn4/Smad4/Gbx1/Tgfb2/Foxg1/Bmp7/Kif5c/Trak2/Nrp2/Kif5b/Chl1/Klf7/Shox2/Kif3a/Rpl24/Slitrk2/Bcl2/Fzd3/B3…	426	1.3461
GO:0007389	pattern specification process	422/11943	422	11943	480/18303	480	18303	1.61233e-30	2.63455e-27	1.12906e-27	Nkx6-2/Ripply2/Nr2f2/Msx2/Yy1/Tbx22/Spry1/Ttc8/Dlx2/Fgfr2/Ets2/Chsy1/Frs2/Hes1/Pitx2/Gas1/Pcdh8/Mnx1/Bhlhe40/Atm/Ascl1/Poglut1/Hoxa4/Prkacb/Rnf111/Bmpr1a/Aurka/Snai1/Mapk8/Ctnnb1/Irx3/Tbr1/Fezf1/Bmpr2/Kdm2b/Fgf1/Pcsk5/Ripply3/Grhl3/Dmrta2/Sfrp2/Dnaaf2/Nphp3/Wnt5a/Hoxa9/Foxa1/Myf6/Hif1a/Ptch1/Crkl/Bmp2/Dll1/Hoxa10/Sema3c/En1/Satb2/Traf3ip1/Mib1/Lrrc6/Gorab/Myf5/Smo/Lef1/Hoxa5/Smad4/Foxg1/Bmp7/Dync…	422	1.34735
GO:0060562	epithelial tube morphogenesis	349/11943	349	11943	388/18303	388	18303	6.26943e-30	8.1954e-27	3.5122e-27	Agtr1b/Msx2/Rhoa/Tead1/Tbx22/Spry1/Twist1/Fgfr2/Cd44/Mthfd1/Ccl11/Gata3/Hes1/Pitx2/Prkacb/Cxcl10/Ctnnb1/Prickle1/Irx3/Tbr1/Lmo4/Kdm2b/Fgf1/Vegfa/Mycn/Spry2/Grhl3/Sfrp2/Nphp3/Ctsh/Wnt5a/Rspo2/Foxa1/Lgr4/Hif1a/Hectd1/Ptch1/Clic4/Zic5/Bmp2/Dll1/Lgr5/Col4a1/Dag1/Bcl10/Pgr/Efnb2/Mib1/Sox9/Lzts2/Smo/Lef1/Epha4/Hoxa5/Smad4/Tgfb2/Met/Bmp7/Lrp6/Med12/Dicer1/Casr/Kdm6a/Kif3a/Tulp3/Bcl2/Abl2/Lbx1/Phactr4/Fz…	349	1.37849
GO:0048562	embryonic organ morphogenesis	299/11943	299	11943	328/18303	328	18303	2.58657e-28	2.81763e-25	1.20752e-25	Tead1/Tbx22/Twist1/Dlx2/Fgfr2/Frs2/Gata3/Tcf7l2/Hes1/Pitx2/Dlx6/Foxf2/Gas1/Hoxa4/Ctnnb1/Tbr1/Kdm2b/Mycn/Spry2/Pou3f4/Grhl3/Nphp3/Wnt5a/Hoxa9/Hif1a/Slitrk6/Dll1/Satb2/Twist2/Mib1/Sox9/Ptprq/Myf5/Smo/Prox1/Hoxa5/Tgfb2/Foxg1/Bmp7/Zeb1/Lrp6/Med12/Fgfr1/Fzd5/Kdm6a/Tbx15/Eif4a3/Shox2/Kif3a/Six3/Tulp3/Lbx1/Phactr4/Fzd3/Mef2c/Hipk2/Tbx20/Grhl2/Notch2/Asxl2/Wnt9a/Ntn1/Gli3/Alx1/Dlg1/Insig1/Col11a1/Ttc39c/…	299	1.39703
GO:0042391	regulation of membrane potential	414/11943	414	11943	475/18303	475	18303	4.17201e-28	3.89547e-25	1.66943e-25	Bdnf/Kcnh7/Ntrk3/Ppid/Akap9/Snca/P2rx2/Rgs4/Adcyap1/Gclc/Pawr/Htr3b/Kcnmb4/Adrb2/Gabra5/Gabra4/Cnga2/Neto1/Bok/Pmaip1/Gabre/Cux2/Hnrnpa1/Scn3b/Ppp3ca/Gnaq/Nlgn1/Atp1b3/Gsk3b/Fmr1/Grid2/Gabrg1/Oprk1/Cacna2d1/Cxadr/Pten/Trpc5/Nalcn/Syne1/Fhl1/Gclm/P2rx4/Nos1ap/Met/Glra3/Cacnb2/Kcnk6/Kcnc2/Gabrb3/Kif5b/Gpr88/Eif4a3/Chrnb4/Chrna7/Bcl2/Rgs7bp/Nr3c2/Gabrq/Slc4a4/Hcn1/Mef2c/Gria3/Grin2b/Akap6/Kcna2/Cacn…	414	1.33572
GO:1990778	protein localization to cell periphery	329/11943	329	11943	371/18303	371	18303	1.42289e-25	1.1625e-22	4.982e-23	Mex3b/Lypla1/Cacng5/Cnpy4/Rab10/Vti1b/Ttc8/Vamp4/Rab11fip2/Arl6/Fam126b/Prkg2/Prkci/Emp2/Plk1/Pgap2/Appl1/Lin7c/Pls1/Itgb1/Sptbn1/Vps35/Gnai1/Stxbp1/Clstn1/Sytl2/Hectd1/Scn3b/Ptch1/Epha3/Tspan15/Clasp2/Atp1b3/Gsk3b/Snap23/Optn/Dag1/P2ry1/Rab8b/Kalrn/Actr3/Stx7/Blzf1/Cacnb2/Lrp6/Sec23a/Mpp5/Kif5b/Cdh1/Arhgef16/Rapgef6/Rock1/Arhgap44/Ehd1/Acsl3/Abca2/Gpr158/Grm1/Tspan5/Fgf13/Clip1/Snx27/Lin7a/Bag4/…	329	1.35904
GO:0021537	telencephalon development	304/11943	304	11943	340/18303	340	18303	3.8623e-25	2.80489e-22	1.20206e-22	Crnkl1/Lhx5/Rhoa/Ttc8/Dlx2/Npy/Nefl/Slc38a2/Hes1/Slc17a6/Ascl1/P2ry12/Crk/Ctnnb1/Tbr1/Fezf1/Kdm2b/Dmrta2/Mboat7/Zbtb18/Neurod6/Wnt5a/Plcb1/Hif1a/Crkl/Bmp2/Ndel1/Coro1c/Gsk3b/Arx/Lrp8/Slc8a1/Sall3/Fbxo45/Mkks/Herc1/Pten/Pafah1b1/Ccdc141/Smo/Lef1/Btbd3/Prox1/Usp9x/Foxg1/Gng12/Lrp6/Fgfr1/Id4/Kif5b/Dicer1/Pex13/Kif3a/Six3/Rtn4rl2/Bcl2/Syne2/Mef2c/Grin2b/Htr5a/Epha5/Erbb4/Fgf13/Slc1a2/Rtn4/Sema3a/Slc7…	304	1.37026
GO:0031346	positive regulation of cell projection organization	422/11943	422	11943	493/18303	493	18303	5.59055e-25	3.65398e-22	1.56594e-22	Dock11/Mstn/Bdnf/Lrrc7/Fut9/Nefl/Ntrk3/Cdc42ep3/Prkci/Hgf/Gng2/Marcks/Tox/Adcyap1/Zfp804a/P2ry12/Snx3/Itgb1/Bmpr2/Tenm1/Vegfa/Ache/Fbxo38/Wnt5a/Itga2/Cntn1/Stk24/Cux2/Ndel1/Coro1c/Epha3/Nlgn1/Gsk3b/Lrp8/Elavl4/Auts2/Fmr1/Cpeb3/Il1rapl1/Arf1/Nptn/Parp6/Cyfip1/Hdac4/Rab8b/Pafah1b1/Ptk6/Trpc5/Kalrn/Actr3/Epha4/Met/Bmp7/Lrp6/Fgfr1/Eps8/Anln/Shox2/Abl2/Ttbk2/Tmem30a/Ehd1/Dnm2/Qk/Cnr1/Syt1/Rims1/Clip1/…	422	1.31182
NIC_eGOCC
ID	Description	GeneRatio	GeneRatioa	GeneRatiob	BgRatio	BgRatioa	BgRatiob	pvalue	p.adjust	qvalue	geneID	Count	Flodenrichment
GO:0042734	presynaptic membrane	195/12212	195	12212	211/18575	211	18575	3.63171e-20	2.80005e-18	1.41446e-18	Kctd16/Syap1/Pcdh8/P2rx2/Marcks/Htr2a/Ctnnb1/Chrm3/Gabra5/Ache/Stxbp1/Cntn1/Slc6a4/Chrm2/Fbxo45/Fmr1/Oprk1/Cacna2d1/Efnb2/P2ry1/Nptn/Epha4/Pcdh17/Kcnc2/Grm8/Chrna7/Rgs7bp/Grm3/Gria3/Grin2b/Cadm1/Kcna2/Adra2a/Cacna1c/Apba1/Adam23/Grm1/Erbb4/Cnr1/Syt1/Rims1/Slc1a2/Nrxn1/Hip1/Cntn5/Htr1b/Ctnna2/Fcho2/Dlg1/Grik4/Gpc4/Ptprd/Kctd12/Erc2/Slc6a5/Oprm1/Nrg1/Htr7/Gria2/Slc4a8/Nlgn2/Atp2b4/Exoc3/Efnb1/Grin2…	195	1.4057
GO:0045211	postsynaptic membrane	291/12212	291	12212	322/18575	322	18575	3.31726e-25	1.11088e-22	5.61164e-23	Cacng5/Kctd16/Lrrtm2/Lrrc7/Ntrk3/Syap1/Akap9/Pcdh8/Marcks/Htr2a/Lin7c/Ctnnb1/Chrm3/Itgb1/Htr3b/Gabra5/Gabra4/Ache/Neto1/Clstn1/Gabre/Cntn1/Slc6a4/Itgb3/Crkl/Ptpro/Dagla/Nlgn1/Chrm2/Slc8a1/Slc16a7/Fbxo45/Grid2/Gabrg1/Oprk1/Cacna2d1/Il1rapl1/Efnb2/Pten/Lrrtm4/P2ry1/Nptn/Epha4/Pcdh17/Syne1/Met/Glra3/Shisa9/Kcnc2/Nrp2/Gabrb3/Grm8/Zc4h2/Chrnb4/Utrn/Chrna7/Slitrk2/Rgs7bp/Grm3/Strn/Chrm5/Dnm2/Cnksr2/Gri…	291	1.37461
GO:0097060	synaptic membrane	413/12212	413	12212	465/18575	465	18575	4.01241e-31	3.09357e-28	1.56273e-28	Cacng5/Kctd16/Lrrtm2/Ptpra/Lrrc7/Ntrk3/Syap1/Akap9/Pcdh8/P2rx2/Marcks/Htr2a/Lin7c/Ctnnb1/Chrm3/Itgb1/Htr3b/Gabra5/Gabra4/Ache/Neto1/Stxbp1/Clstn1/Gabre/Cntn1/Slc6a4/Itgb3/Crkl/Ptpro/Dagla/Nlgn1/Chrm2/Slc8a1/Slc16a7/Fbxo45/Nt5e/Fmr1/Grid2/Gabrg1/Oprk1/Cacna2d1/Il1rapl1/Efnb2/Pten/Lrrtm4/P2ry1/Nptn/Epha4/Pcdh17/Syne1/Met/Glra3/Shisa9/Kcnc2/Nrp2/Gabrb3/Grm8/Zc4h2/Chrnb4/Utrn/Chrna7/Slitrk2/Rgs7bp/Gr…	413	1.35095
GO:0150034	distal axon	382/12212	382	12212	440/18575	440	18575	2.3394e-24	3.60736e-22	1.82227e-22	Bdnf/Ppp1r2/Calca/Calm2/Slc18a2/Npy/Nefl/Syap1/Snca/P2rx2/Aak1/Marcks/Adcyap1/Zfp804a/Penk/Chrm3/Ache/Dclk1/Basp1/Stxbp1/Itga2/Tshz3/Ptch1/Fkbp1a/Ndel1/Clasp2/Chrm2/Gsk3b/Snap23/Slc8a1/Myo9a/Elavl4/Auts2/Fmr1/Pgr/Oprk1/Cxadr/Cyfip1/Pafah1b1/Trpc5/Smo/Usp9x/Epha4/Stx7/P2rx4/Kif5c/Trak2/Kcnc2/Gabrb3/Eps8/Kif5b/Dicer1/Casr/Cdh1/Scamp1/Utrn/Chrna7/Hnrnpr/Map2/Hcn1/Dnm2/Srsf10/Gria3/Grin2b/Lmtk2/Kcna2…	382	1.32054
GO:0098984	neuron to neuron synapse	398/12212	398	12212	459/18575	459	18575	4.32248e-25	1.11088e-22	5.61164e-23	Sh3gl3/Cacng5/Lrrtm2/Lrrc7/Akap9/P2rx2/Lin7c/Penk/Ctnnb1/Chrm3/Sptbn1/Bmpr2/Anks1b/Vps35/Dclk1/Neto1/Clstn1/Bcas1/Ptch1/Rs1/Neto2/Ptpro/Dagla/Nlgn1/Chrm2/Gsk3b/Lrp8/Slc8a1/Slc16a7/Homer1/Cript/Dgcr8/Fbxo45/Ncoa2/Slc30a3/Fmr1/Grid2/Il1rapl1/Efnb2/Lrrtm4/P2ry1/Mib1/Arf1/Nptn/Smo/Kalrn/Epha4/Arfgef2/P2rx4/Met/Shisa9/Bace1/Mal2/Eps8/Hnrnpa3/Pde4b/Chrna7/Rgs7bp/Grm3/Strn/Nr3c2/Map2/Arhgap44/Dnm2/Cnksr…	398	1.3189
GO:0014069	postsynaptic density	368/12212	368	12212	425/18575	425	18575	4.88106e-23	5.37614e-21	2.71578e-21	Sh3gl3/Cacng5/Lrrtm2/Lrrc7/Akap9/P2rx2/Lin7c/Ctnnb1/Chrm3/Sptbn1/Bmpr2/Anks1b/Vps35/Dclk1/Neto1/Clstn1/Bcas1/Ptch1/Neto2/Ptpro/Dagla/Nlgn1/Gsk3b/Lrp8/Slc8a1/Slc16a7/Homer1/Cript/Dgcr8/Fbxo45/Ncoa2/Fmr1/Grid2/Il1rapl1/Efnb2/Lrrtm4/P2ry1/Mib1/Arf1/Nptn/Smo/Kalrn/Epha4/P2rx4/Met/Shisa9/Eps8/Hnrnpa3/Pde4b/Chrna7/Rgs7bp/Grm3/Strn/Nr3c2/Map2/Arhgap44/Dnm2/Cnksr2/Gria3/Grin2b/Cadm1/Adra2a/Inpp4a/Cacna1c…	368	1.31705
GO:0032279	asymmetric synapse	373/12212	373	12212	431/18575	431	18575	3.0518e-23	3.92157e-21	1.98099e-21	Sh3gl3/Cacng5/Lrrtm2/Lrrc7/Akap9/P2rx2/Lin7c/Ctnnb1/Chrm3/Sptbn1/Bmpr2/Anks1b/Vps35/Dclk1/Neto1/Clstn1/Bcas1/Ptch1/Neto2/Ptpro/Dagla/Nlgn1/Chrm2/Gsk3b/Lrp8/Slc8a1/Slc16a7/Homer1/Cript/Dgcr8/Fbxo45/Ncoa2/Fmr1/Grid2/Il1rapl1/Efnb2/Lrrtm4/P2ry1/Mib1/Arf1/Nptn/Smo/Kalrn/Epha4/Arfgef2/P2rx4/Met/Shisa9/Eps8/Hnrnpa3/Pde4b/Chrna7/Rgs7bp/Grm3/Strn/Nr3c2/Map2/Arhgap44/Dnm2/Cnksr2/Gria3/Grin2b/Cadm1/Adra2a/…	373	1.31636
GO:0099572	postsynaptic specialization	398/12212	398	12212	460/18575	460	18575	1.12298e-24	2.16454e-22	1.09342e-22	Sh3gl3/Cacng5/Lrrtm2/Lrrc7/Akap9/P2rx2/Lin7c/Ctnnb1/Chrm3/Sptbn1/Bmpr2/Anks1b/Gabra5/Gabra4/Vps35/Dclk1/Neto1/Clstn1/Bcas1/Ptch1/Neto2/Ptpro/Dagla/Nlgn1/Gsk3b/Lrp8/Slc8a1/Slc16a7/Homer1/Cript/Dgcr8/Fbxo45/Ncoa2/Fmr1/Grid2/Il1rapl1/Efnb2/Lrrtm4/P2ry1/Mib1/Arf1/Nptn/Smo/Kalrn/Epha4/P2rx4/Met/Glra3/Shisa9/Gabrb3/Eps8/Hnrnpa3/Pde4b/Chrna7/Rgs7bp/Grm3/Strn/Nr3c2/Yes1/Map2/Arhgap44/Dnm2/Cnksr2/Gria3/Gr…	398	1.31603
GO:0031252	cell leading edge	374/12212	374	12212	434/18575	434	18575	1.49377e-22	1.43962e-20	7.2723e-21	Psd3/Rhoa/Cd44/Wwc1/Prkci/Dusp22/Mtmr6/Aak1/Appl1/Itgav/Ctnnb1/Itgb1/Sptbn1/Iqgap2/Lmo4/Psd2/Gabra5/Gabra4/Ache/Gabre/Ptk2/Itgb3/Ndel1/Coro1c/Dagla/Clasp2/Klhl2/Mcf2l/Dag1/Gabrg1/Fam107a/Cd2ap/Arf1/Cyfip1/Pafah1b1/Ptk6/Actr3/Acap2/Wipf1/Plek/Shisa9/Bmx/Kcnc2/Eps8/Cdh1/Chrna7/Abl2/Spata13/Syne2/Pkn2/Phactr4/Rock1/Map2/Hcn1/Duox2/Arhgap44/Dnm2/Kcna2/Antxr1/Fgd4/Ablim3/Clip1/Slc1a2/Mkln1/Rasa1/Raph1…	374	1.31076
GO:0005667	transcription regulator complex	356/12212	356	12212	415/18575	415	18575	8.81846e-21	7.55448e-19	3.81617e-19	Sox15/Scx/Msx2/Figla/Yy1/Tle4/Tead1/Lin9/Tcf3/Nfyb/Brf2/Gtf2a1/Spi1/Nr4a2/C1d/Tcf7l2/Pitx2/Yy2/Nr5a2/Foxf2/Etv3/Insm1/Six6/Ascl1/Sub1/Arntl/Cbx5/Ctnnb1/Lmo4/Klf4/Hdac9/Klf5/Arid4a/Hoxa9/Cbfb/Hif1a/Tead4/Rbbp7/Arntl2/Hoxa10/Sox5/Snai3/Bdp1/Satb2/Twist2/E2f8/Prdm10/Hdac4/Sox9/Rfx5/Lef1/Ascl4/Smad4/Smad7/Lin52/Naa15/Mier1/Hdac3/Taf1d/Pou3f1/Sfpq/Tbx15/Crx/Taf1/Smad9/Six3/Med14/Tbl1xr1/Arnt2/Rcor1/Sn…	356	1.3048
NIC_eGOMF
ID	Description	GeneRatio	GeneRatioa	GeneRatiob	BgRatio	BgRatioa	BgRatiob	pvalue	p.adjust	qvalue	geneID	Count	Flodenrichment
GO:0001217	DNA-binding transcription repressor activity	273/11225	273	11225	307/17023	307	17023	6.6572e-21	1.5964e-18	8.8856e-19	Nkx6-2/Msx2/Foxd3/Bcl6/Yy1/Cnbp/Tcf3/Klf12/Hivep1/Ets2/Spi1/Gata3/Zbtb20/Erf/Hes1/Pitx2/Hmbox1/Etv3/Sp2/Insm1/Satb1/Bhlhe40/Ascl1/Mkx/Zbtb25/Snai1/Zfp763/Fezf1/Zfp219/Zfp281/Foxq1/Zbtb18/Cux2/Zfp239/Zkscan3/Arx/Snai3/Foxo1/En1/Nr1d2/Zfp382/E2f8/Gcfc2/Snai2/Prox1/Zbtb49/Zeb1/Myt1l/Pou3f1/Zfp248/Zbtb6/Foxo3/Tbx15/Bach2/Hic1/Mlx/Zbtb39/Zfp955a/Purg/Hhex/Dach1/St18/Aebp2/Atf7/Nr3c1/Zfp148/Zbtb1/Pou4f…	273	1.34857
GO:0001227	DNA-binding transcription repressor activity, RNA polymerase II-specific	272/11225	272	11225	306/17023	306	17023	9.04546e-21	1.80758e-18	1.00611e-18	Nkx6-2/Msx2/Foxd3/Bcl6/Yy1/Cnbp/Tcf3/Klf12/Hivep1/Ets2/Spi1/Gata3/Zbtb20/Erf/Hes1/Pitx2/Hmbox1/Etv3/Sp2/Insm1/Satb1/Bhlhe40/Ascl1/Mkx/Zbtb25/Snai1/Zfp763/Fezf1/Zfp219/Zfp281/Foxq1/Zbtb18/Cux2/Zfp239/Zkscan3/Arx/Snai3/Foxo1/En1/Nr1d2/Zfp382/E2f8/Gcfc2/Snai2/Prox1/Zbtb49/Zeb1/Myt1l/Pou3f1/Zfp248/Zbtb6/Foxo3/Tbx15/Bach2/Hic1/Mlx/Zbtb39/Zfp955a/Purg/Hhex/Dach1/St18/Aebp2/Atf7/Nr3c1/Zfp148/Zbtb1/Pou4f…	272	1.34802
GO:0140297	DNA-binding transcription factor binding	329/11225	329	11225	373/17023	373	17023	1.70452e-23	5.10929e-21	2.84385e-21	Scx/Lrif1/Psip1/Nfkbia/Tle4/Tcf3/Nfyb/Tsc22d3/Ttc8/Twist1/Atf2/Ets2/Gmnn/Gtf2a1/Spi1/Nr4a2/C1d/Tcf7l2/Pitx2/Ppid/Bhlhe40/Ascl1/Sub1/Hoxa4/Arntl/Asah1/Cry1/Cbx5/Ctnnb1/Klf4/Hdac9/Txlng/Trim68/Klf5/Med13/Rnf6/Hif1a/Gtf2i/Mef2d/Dll1/Ctdp1/Kdm3a/Gsk3b/Smarcb1/Ncoa2/Mkks/Bcl10/Hdac4/Sox9/Lef1/Prox1/Dhx33/Nrip1/Mier1/Mdfic/Hdac3/Med12/Mier3/Crx/Taf1/Stat5b/Lats1/Bcl2/Strn/Zfp366/Arnt2/Nr1i2/Brms1/Mef2a…	329	1.33763
GO:0017016	Ras GTPase binding	345/11225	345	11225	392/17023	392	17023	3.4925e-24	1.39583e-21	7.76927e-22	Prex2/Dock11/Xpo1/Rabggtb/Rab11fip2/Rab3gap2/Kif16b/Arhgef3/Cdc42ep3/Ralgds/Elmo1/Whamm/Iqgap2/Ranbp2/Wdr41/Tnfaip1/Coro1c/Optn/Mcf2l/Dennd5b/Pard6b/Sos2/Ipo7/Rab11fip3/Cyfip1/Evi5/Akap13/Tbc1d4/Kalrn/Mlph/Acap2/Dennd4a/Rasgef1a/Nutf2/Tnpo1/Dennd1b/Eps8/Anln/Cdc42se2/Kif3a/Arhgef16/Rapgef6/Net1/Spata13/Pkn2/Rock1/Ipo11/Sytl5/Arhgap44/Ehd1/Sbf2/Xpo7/Fmnl2/Vav3/Fgd4/Rims1/Rock2/Daam1/Tbc1d14/Mycbp2…	345	1.3347
GO:0046873	metal ion transmembrane transporter activity	367/11225	367	11225	417/17023	417	17023	1.18566e-25	1.42161e-22	7.91275e-23	Tusc3/Cacng5/Kcnh7/Slc18a2/Slc38a2/Slc22a1/Itgav/Slc30a5/Mcu/Mcoln3/Slc5a3/Kcnmb4/Trpv5/Cnga2/Slc5a8/Slc5a1/Slc4a11/Scn3b/Slc6a4/Slc12a4/Slc38a1/Atp1b3/Slc10a5/Slc8a1/Kcnab1/Cnnm4/Slc5a5/Slc10a4/Slc30a3/Cacna2d1/Trpc5/Nalcn/Slc39a10/Slc30a2/Asic4/Slc10a3/P2rx4/Slc28a2/Cacnb2/Slc39a9/Slc10a6/Kcnk6/Slc30a4/Magt1/Kcnc2/Slc34a2/Nipa1/Slc12a1/Slc4a4/Hcn1/Kcnt2/Grin2b/Kcna2/Cacna1c/Cnr1/Slc1a2/Cachd1/K…	367	1.33469
GO:0031267	small GTPase binding	358/11225	358	11225	407/17023	407	17023	6.01937e-25	3.60861e-22	2.00857e-22	Prex2/Dock11/Xpo1/Rabggtb/Rab11fip2/Rnf152/Rab3gap2/Kif16b/Arhgef3/Cdc42ep3/Ralgds/Elmo1/Whamm/Iqgap2/Ranbp2/Wdr41/Tnfaip1/Coro1c/Optn/Mcf2l/Dennd5b/Pard6b/Errfi1/Sos2/Ipo7/Rab11fip3/Cyfip1/Evi5/Akap13/Tbc1d4/Kalrn/Mlph/Acap2/Dennd4a/Rasgef1a/Nutf2/Tnpo1/Dennd1b/Eps8/Anln/Cdc42se2/Kif3a/Arhgef16/Rapgef6/Net1/Spata13/Pkn2/Rock1/Ipo11/Sytl5/Arhgap44/Ehd1/Sbf2/Xpo7/Fmnl2/Vav3/Fgd4/Rims1/Rock2/Daam1/…	358	1.33395
GO:0061629	RNA polymerase II-specific DNA-binding transcription factor binding	254/11225	254	11225	289/17023	289	17023	5.99945e-18	7.99261e-16	4.44872e-16	Lrif1/Nfkbia/Tcf3/Ttc8/Atf2/Ets2/Gtf2a1/Spi1/Nr4a2/C1d/Tcf7l2/Pitx2/Ppid/Bhlhe40/Arntl/Asah1/Cry1/Ctnnb1/Klf4/Trim68/Med13/Rnf6/Hif1a/Gtf2i/Dll1/Ctdp1/Kdm3a/Gsk3b/Smarcb1/Ncoa2/Mkks/Bcl10/Lef1/Prox1/Nrip1/Mier1/Mdfic/Hdac3/Med12/Mier3/Crx/Taf1/Stat5b/Lats1/Strn/Zfp366/Arnt2/Nr1i2/Brms1/Asxl1/Hipk2/Grm1/Tbx20/Anxa4/Prkcb/Uba3/Notch2/Taf4b/Jup/Creb1/Nhlh2/Med1/Ahr/Foxp2/Hey2/Ppara/Ctbp2/Smad3/Zbtb7…	254	1.33286
GO:0008509	anion transmembrane transporter activity	302/11225	302	11225	350/17023	350	17023	2.22843e-18	3.81698e-16	2.12455e-16	Slc25a5/Ano4/Slc18a2/Slc38a2/Slc25a31/Slc17a6/Slc22a1/Slc37a1/Gabra5/Gabra4/Slc25a40/Slc5a8/Gabre/Slc7a12/Slc4a11/Slc6a4/Clic4/Slc12a4/Slc38a1/Slc10a5/Slc16a7/Slc5a5/Slc25a16/Slc10a4/Gabrg1/Slc37a4/Slc10a3/Nmur2/Slc26a7/Glra3/Slc10a6/Gabrb3/Slc16a10/Slc26a9/Slc5a12/Lrrc8e/Slc7a1/Slc12a1/Gabrq/Slc4a4/Slc26a2/Ano9/Slc1a2/Clcn3/Slc7a2/Slc7a11/Slc7a13/Gabrg2/Slc24a1/Cftr/Slco3a1/Ano1/Clcn1/Abcc2/Slc1…	302	1.30854
GO:0003712	transcription coregulator activity	360/11225	360	11225	427/17023	427	17023	4.87555e-18	7.30723e-16	4.06723e-16	Casp8ap2/Ruvbl2/Msx2/Tob1/Psip1/Tle4/Tcf3/Tcerg1l/Gmnn/Tada1/C1d/Wwc1/Hmgb2/Ccar1/Mycbp/Birc2/Bhlhe40/Sub1/Asah1/Rbm39/Ctnnb1/Hdac9/Basp1/Nup98/Zbtb18/Irf2bp2/Rbpms/Med13/Cbfb/Cops2/Kdm3a/Smarcb1/Zfpm2/Gon4l/Btaf1/Rap2c/Pir/Ncoa2/Bcl10/Ccar2/Yaf2/E2f8/Pias1/Hdac4/Dcaf6/Nrip1/Smad4/Mier1/Tada2b/Zfp451/Myt1l/Scai/Hdac3/Med12/Cnot7/Mier3/Maml1/Med14/Tbl1xr1/Zfp366/Rcor1/Elane/Mef2a/Asxl1/Med13l/Maml…	360	1.27857
GO:0019787	ubiquitin-like protein transferase activity	353/11225	353	11225	421/17023	421	17023	6.17555e-17	7.40448e-15	4.12137e-15	Trim63/Syvn1/Ube2b/Ube2d3/Trim69/Ccnc/Xiap/Peli1/Fbxl14/Rnf152/Rnf11/Trim5/Ercc8/Ube2h/Arih1/Bfar/Birc2/Ube2w/Chfr/Rnf111/Rnf144a/Rnf170/Rnf220/Rnf186/Ranbp2/Trim68/Trim59/Tnfaip1/Rnf39/Rnf6/Hectd1/Pdzrn3/Klhl21/Cul3/Wwp1/Ltn1/Ube3c/Ube2e1/Smurf2/Herc1/Birc3/Ufl1/Mib1/Ube2c/Pias1/Hdac4/Cul4a/Ubr1/Rc3h1/Zfp451/Rnf38/Rnf213/G2e3/Nsmce2/Med12/Ube2u/Dzip3/Malt1/Taf1/Rnf182/Rnf144b/Cul1/Rnf2/Fbxo4/Fbx…	353	1.27158

## Sheet: NIC_eKEGG
ID	Description	GeneRatio	GeneRatioa	GeneRatiob	BgRatio	BgRatioa	BgRatiob	pvalue	p.adjust	qvalue	geneID	Count	Flodenrichment
rno04550	Signaling pathways regulating pluripotency of stem cells	135/5593	135	5593	142/8902	142	8902	7.23298e-20	5.93104e-18	1.84631e-18	124451/171046/25022/25261/81507/681178/84353/114505/140590/64566/81680/84027/288151/299766/50554/312398/79114/291023/317674/295602/29134/85435/100360552/266715/24514/85243/310914/500047/24525/364754/84598/114208/287357/24205/25231/29357/307829/25631/25718/170911/116590/25205/24605/25513/24482/245921/114487/303251/305624/29414/79558/282581/25125/306571/59112/103690132/303491/29263/303586/64558/299…	135	1.51317
rno05224	Breast cancer	139/5593	139	5593	148/8902	148	8902	5.843e-19	2.73786e-17	8.52287e-18	29348/679869/29577/29146/60464/84353/29147/25317/64566/84010/84027/85384/25154/50557/161452/312781/79114/317674/60662/29134/100360552/266715/85243/500047/24525/364754/29492/64030/24329/287357/24205/114486/311332/155430/113927/114858/25149/308692/56761/114483/25718/170911/24790/170700/116590/291105/24605/25513/24482/114487/303251/29414/282581/116499/303586/312451/684111/114851/64558/24881/84584/25…	139	1.49484
rno04390	Hippo signaling pathway	146/5593	146	5593	158/8902	158	8902	5.29529e-18	1.92984e-16	6.00753e-17	361630/679869/25261/303039/84006/60371/81507/84353/140590/25317/64566/683522/29373/84027/305922/362279/78971/360920/25554/161452/50554/297387/81809/81516/85272/314259/317674/29134/83502/100360552/308265/266715/252833/310914/500047/364754/679119/64033/287357/297357/24205/25252/117256/29357/25631/64053/361839/25717/114487/29495/303251/24672/117104/282581/29753/25578/29591/303586/312451/316101/64558…	146	1.47075
rno04360	Axon guidance	167/5593	167	5593	181/8902	181	8902	3.03808e-20	3.32163e-18	1.03401e-18	366624/117273/50685/24511/140590/29749/25686/64566/89830/25614/24674/29210/84027/296787/362279/306636/140933/25273/316539/24553/85272/81762/266715/252833/85243/310914/24525/641521/79208/307395/310207/246331/25537/25676/29751/81735/116683/310753/114523/500287/171287/367072/361400/29202/315996/170911/29433/116590/24605/25513/312213/25150/361324/25186/360272/64465/686310/363142/360891/25311/83805/31…	167	1.46852
rno05205	Proteoglycans in cancer	186/5593	186	5593	207/8902	207	8902	4.57058e-19	2.49858e-17	7.778e-18	117273/363425/85489/314850/25406/24446/293508/296456/84353/24511/83785/64566/170921/29560/89830/25614/29302/85384/25358/59327/29393/25273/81809/24553/79114/317674/100360552/81762/266715/85243/500047/445442/24525/295378/364754/59323/25537/25023/24329/29260/287357/81687/367072/114486/362036/500985/315655/304813/29357/25718/170911/365355/304109/116670/81678/116590/24605/25513/24482/114487/64465/2569…	186	1.43016
rno04510	Focal adhesion	179/5593	179	5593	200/8902	200	8902	5.98247e-18	1.96225e-16	6.10841e-17	171337/309081/117273/363425/63879/24446/60371/50685/296456/54245/116554/84353/24511/83785/170921/25614/29302/287942/84027/290905/85384/292406/78971/29393/309419/50557/24553/291926/363457/24224/81762/85243/445442/295378/64033/311061/25537/25023/24329/299012/114517/311144/114486/685004/114858/365865/304813/25718/364786/170911/116670/305679/29433/117036/116590/54251/25513/25118/24482/25150/64465/305…	179	1.42451
rno04020	Calcium signaling pathway	211/5593	211	5593	238/8902	238	8902	9.37584e-20	6.15055e-18	1.91465e-18	81638/25176/29348/25570/25022/50663/29613/689108/60464/24446/114115/29595/293508/294560/308022/24260/25317/24176/83785/29749/81742/24654/24599/24674/81666/81645/29715/29659/24553/79114/114099/25652/60662/291926/25302/53949/25689/24239/24414/24418/59323/25023/117087/24329/24807/54260/304592/25107/305509/25050/257648/25031/24611/81662/170700/65032/81678/361377/54251/64561/29600/24929/24409/59299/30…	211	1.41107
rno04010	MAPK signaling pathway	259/5593	259	5593	293/8902	293	8902	1.41907e-23	2.32728e-21	7.24473e-22	171337/140726/29348/24225/59325/25022/81647/300980/60464/286993/24446/293508/54245/116554/25317/83785/29749/24666/365057/287942/24674/85384/25399/81809/89804/24553/116600/114120/79114/317203/60662/297682/89807/499497/24239/24525/59323/294924/25023/25676/64030/24329/116683/314384/114486/116667/257648/361400/94202/25663/303823/303200/25718/365355/363520/114513/170700/313874/114495/293694/25597/1407…	259	1.40694
rno04014	Ras signaling pathway	204/5593	204	5593	231/8902	231	8902	1.12586e-18	4.61604e-17	1.43696e-17	171337/680149/29348/24225/117273/25022/304063/50663/60464/24446/80850/29622/293508/116554/25317/83785/85384/294962/89804/24553/114120/79114/60662/304883/89807/24356/305584/85243/24410/24525/25023/25676/64030/24329/116683/362799/114858/25718/170911/365355/304109/114513/170700/313874/65032/25597/29433/289080/24592/309295/79121/116590/140635/54251/24605/311622/25513/24482/24954/288691/84014/24409/64…	204	1.4056
rno04151	PI3K-Akt signaling pathway	301/5593	301	5593	345/8902	345	8902	4.82472e-25	1.58251e-22	4.92629e-23	287287/680149/29348/24225/25647/59325/171498/25022/81647/298213/60430/60464/24446/80850/362862/296456/24511/25317/83785/170921/500261/25614/29302/81645/84027/83571/290905/85384/294962/292406/29393/50557/25704/89804/24553/114120/79114/294515/500131/60662/362485/363457/24224/65248/89807/207122/24514/85243/24684/302378/445442/24525/299147/59323/64547/64033/311061/84598/64030/24329/116683/29260/81646…	301	1.38864
